# Supplementary material
Source: Royal Society of Chemistry journal article supplement (doi:10.1039/d6pm00077k)
Supplement: d6pm00077k1.pdf [file d6pm00077k1.pdf]

## **Supporting Information**

### **Dual Cross-linked Biodegradable Polyelectrolyte Hydrogel Actuator for Bi-Directional pH-Responsive Drug Release**

**Govind Chaudhary<sup>1</sup>, Soni Jadoun<sup>1</sup>, Komal Rani<sup>1</sup>, Manikrishna Lakavathu<sup>2</sup>, Aashish Sharma<sup>1\*</sup>**

\*Corresponding Author- Prof. (Dr.) Aashish Sharma;

Email: pharma.aashish@gmail.com

ORCID: <https://orcid.org/0000-0001-8598-0682>

<sup>1</sup>Address: Department of Pharmacy, School of Healthcare and Allied Sciences, Sohna-Gurugram Road, Sohna-122103, Gurugram, Haryana, India

<sup>2</sup>Indian Institute of Science Education and Research Thiruvananthapuram (IISER TVM), Maruthamala, PO, Vithura, Thiruvananthapuram - 695551. Kerala, India

**Table S1:** Absorbance values of standard solutions of NEO

| <b>S. No</b> | <b>Conc.<br/>mg/mL</b> | <b>Mean Absorbance<br/>(n=3)</b> | <b>SD</b> |
|--------------|------------------------|----------------------------------|-----------|
| 1            | 1                      | 0.0283                           | 0.0045    |
| 2            | 3                      | 0.086                            | 0.0101    |
| 3            | 5                      | 0.126                            | 0.0017    |
| 4            | 7                      | 0.162                            | 0.0162    |
| 5            | 9                      | 0.222                            | 0.0017    |
| 6            | 11                     | 0.268                            | 0.007     |

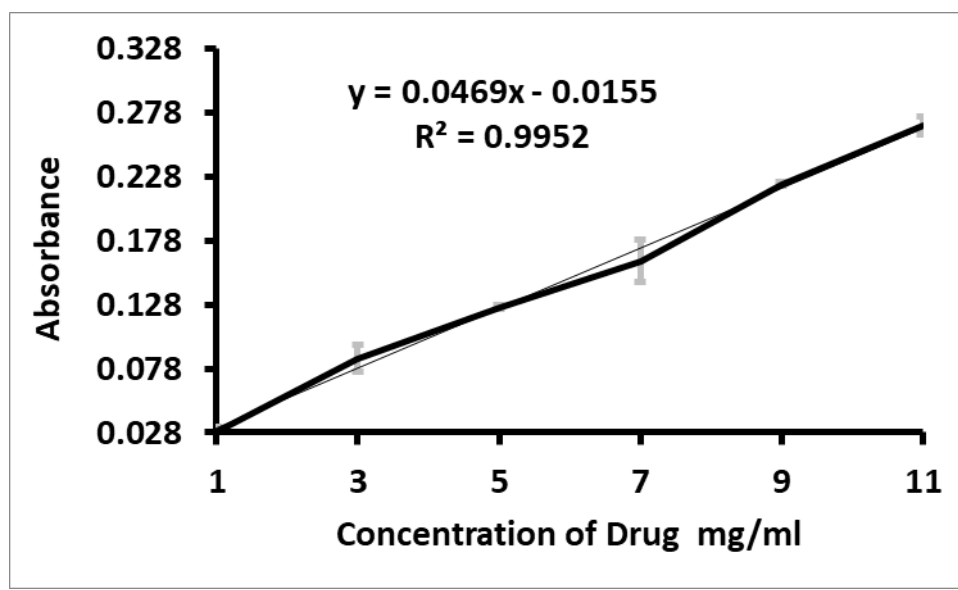

**Figure S1:** Standard curve of Neomycin Sulphate (NEO) in distilled water.

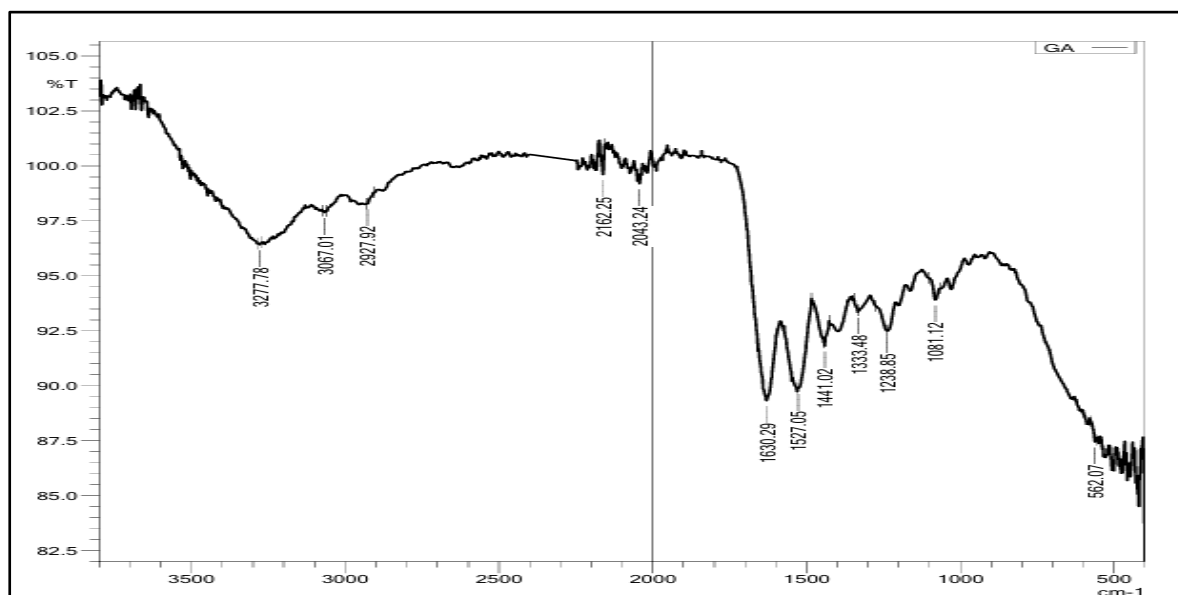

**Figure S2:** FTIR spectrum of gelatin (with KBr)

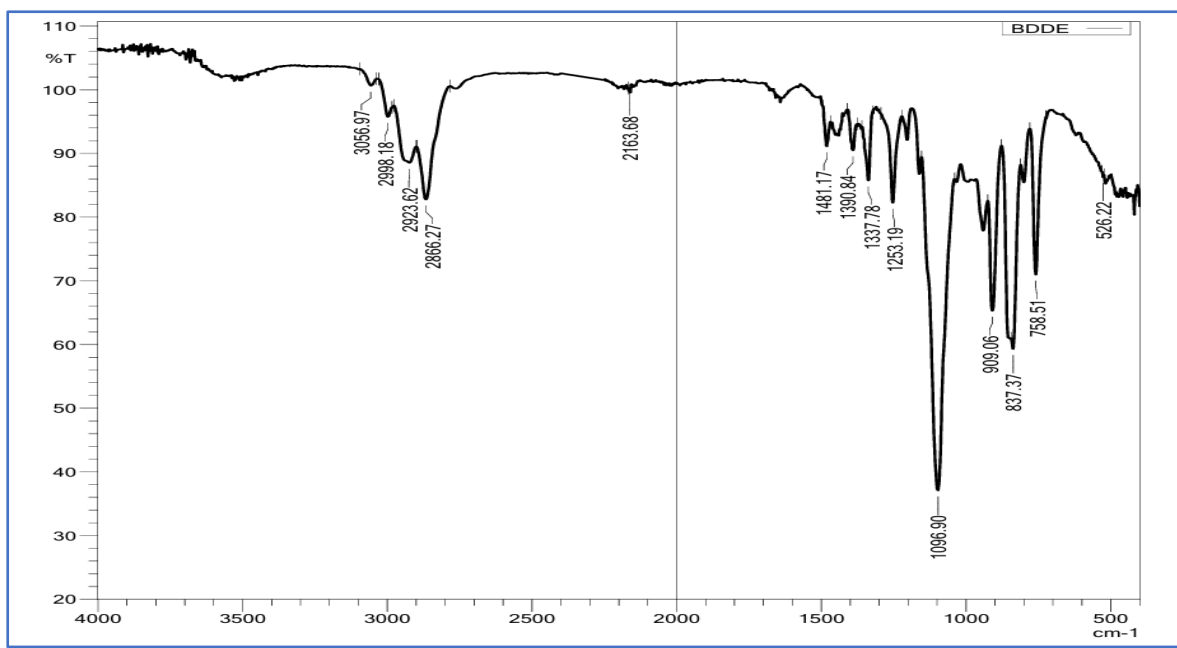

**Figure S3:** FTIR spectrum of BDDE (as a film on NaCl window)

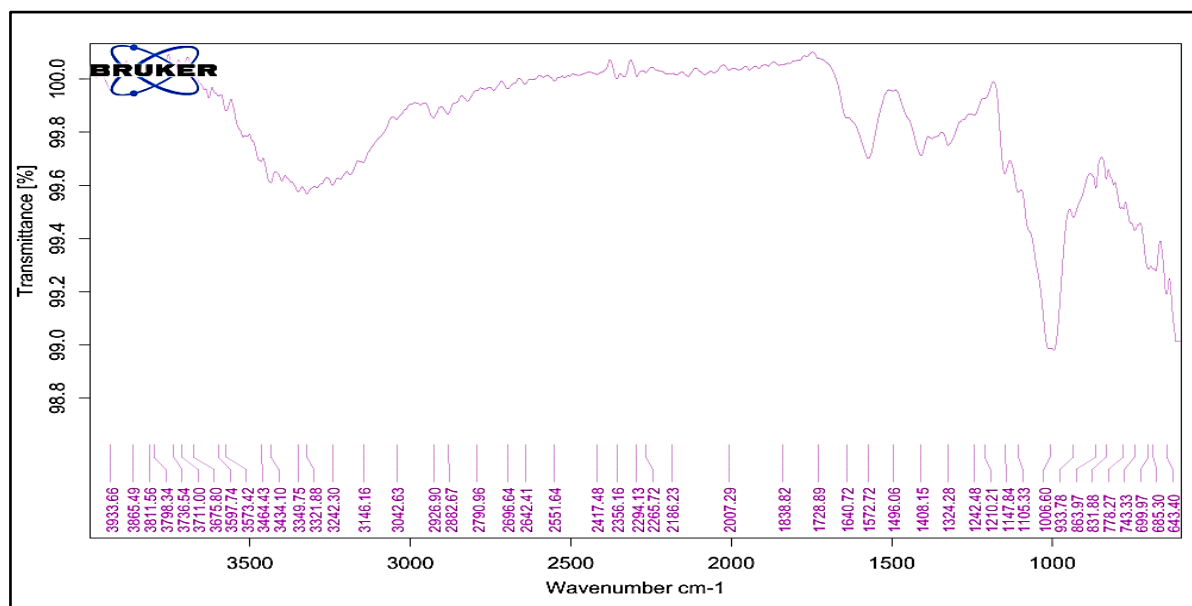

**Figure S4:** FTIR spectrum of CMC (with KBr)

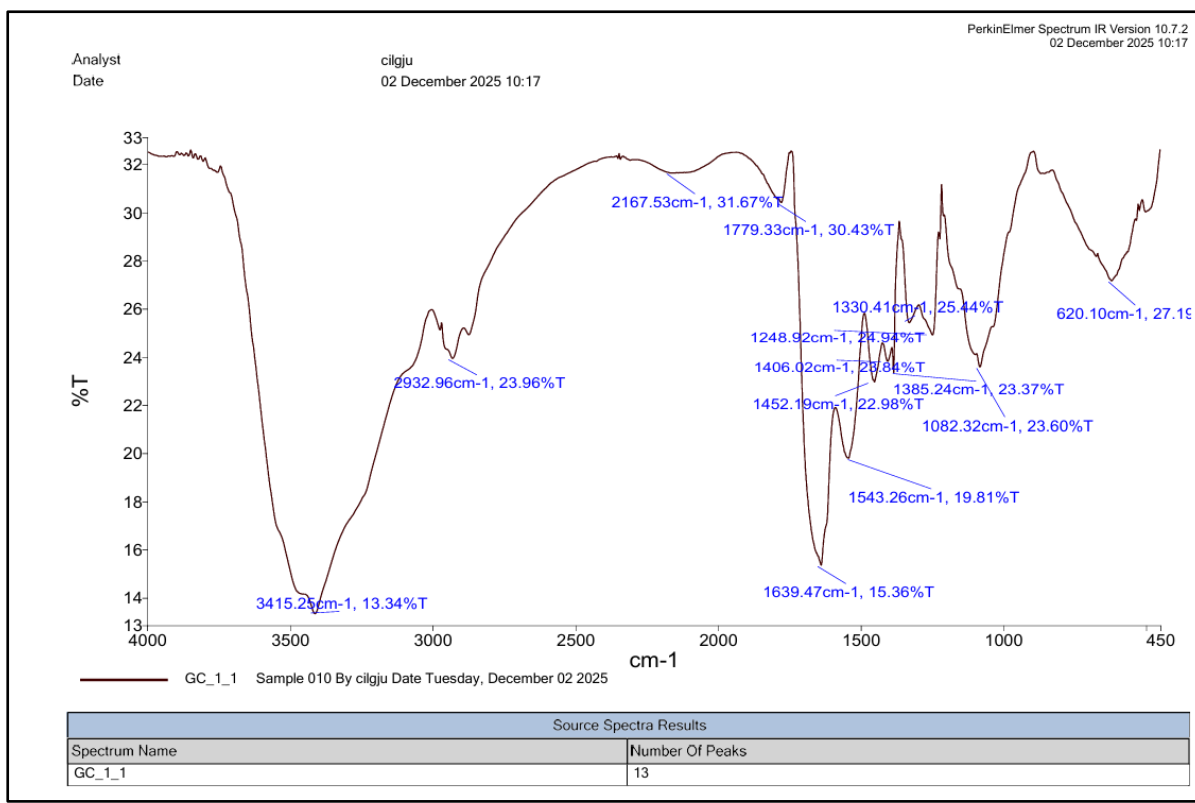

**Figure S5:** FTIR spectrum of hydrogel (with KBr)

**Table S2:** Result analysis of FTIR spectrum of gelatin, BDDE and CMC from figure no. S2, S3 and S4 respectively.

| Functional Groups | CMC                                                  |                                           | Gelatin                                              |                                           | BDDE                                                 |                                           |
|-------------------|------------------------------------------------------|-------------------------------------------|------------------------------------------------------|-------------------------------------------|------------------------------------------------------|-------------------------------------------|
|                   | Ref. <sup>1</sup><br>(IR Peaks);<br>cm <sup>-1</sup> | Sample<br>(IR Peaks);<br>cm <sup>-1</sup> | Ref. <sup>2</sup><br>(IR Peaks);<br>cm <sup>-1</sup> | Sample<br>(IR Peaks);<br>cm <sup>-1</sup> | Ref. <sup>3</sup><br>(IR Peaks);<br>cm <sup>-1</sup> | Sample<br>(IR Peaks);<br>cm <sup>-1</sup> |
| O-H               | 3202                                                 | 3242                                      |                                                      |                                           |                                                      |                                           |
| C-H               | 2922-2872                                            | 2926                                      | 2950-2850                                            | 2927                                      |                                                      |                                           |
| CH <sub>2</sub>   |                                                      |                                           |                                                      |                                           | 2973                                                 | 2998                                      |
| N-H               | 3400-3250                                            | 3349                                      |                                                      |                                           |                                                      |                                           |
| Amide -A          |                                                      |                                           | 3433                                                 | 3277                                      |                                                      |                                           |
| C=O (Amide I)     |                                                      |                                           | 1630                                                 | 1630                                      |                                                      |                                           |
| C-O-C             | 1107-1039                                            | 1050-1100                                 |                                                      |                                           | 990                                                  | 1096                                      |
| COO               | 1587                                                 | 1572                                      |                                                      |                                           |                                                      |                                           |
| N-H (Amide II)    |                                                      |                                           | 1565                                                 | 1527                                      |                                                      |                                           |
| C-N (Amide III)   |                                                      |                                           | 1240                                                 | 1238                                      |                                                      |                                           |

**Table S3:** Result analysis of FTIR spectrum of hydrogel figure no. S5

| Functional Groups                        | CMC-BDDE                                                              |                                           | Gelatin-BDDE                                         |                                           |
|------------------------------------------|-----------------------------------------------------------------------|-------------------------------------------|------------------------------------------------------|-------------------------------------------|
|                                          | Ref. <sup>4</sup><br>(IR Peaks);<br>cm <sup>-1</sup>                  | Sample<br>(IR Peaks);<br>cm <sup>-1</sup> | Ref. <sup>5</sup><br>(IR Peaks);<br>cm <sup>-1</sup> | Sample<br>(IR Peaks);<br>cm <sup>-1</sup> |
| O-H                                      | 3398                                                                  | 3415                                      |                                                      |                                           |
| CH <sub>2</sub>                          | 2909                                                                  | 2932                                      |                                                      |                                           |
| C-O-C                                    | 1065                                                                  | 1082                                      |                                                      |                                           |
| C-O (Ester)                              | 1735 -1770                                                            | 1779                                      |                                                      |                                           |
| Amide A                                  |                                                                       |                                           | 1700-1600                                            | 1639                                      |
| Amide I C-O<br>Stretching                |                                                                       |                                           | 1565-1520                                            | 1543                                      |
| Amide II N-H<br>Bending                  |                                                                       |                                           | 1240-670                                             | 1082                                      |
| Amide III vibration<br>of C-N Stretching |                                                                       |                                           | 3500-3000                                            | 3415                                      |
| Alkane C-H<br>Stretching                 | 3000-2800                                                             | 2950-2850                                 | 3000-2800                                            | 2950-2850                                 |
| Secondary amines<br>N-H Stretching       | Merging of OH stretching of<br>CMC with sec. amines N-H<br>stretching |                                           | 3500-3300                                            | 3440-3350                                 |

**References:**

1. M. L. H. Rozali, N. H. Ahmad and M. I. N. Mohamad Isa, *Am.-Eurasian J. Sustain. Agric.*, 2015, 9, 39–45.
2. M. P. Das and P. R. Suguna, *Int. J. Pharm. Pharm. Sci.*, 2017, 9, 239–242.
3. J. Andrade del Olmo, L. Pérez-Álvarez, V. Sáez Martínez, S. Benito Cid, R. Pérez González, J. L. Vilas-Vilela and J. M. Alonso, *Gels*, 2022, 8, 223.
4. R. Nicu, G. Lisa, R. N. Darie-Niță, M. I. Avadanei, A. Bargan, D. Rusu and D. E. Ciolacu, *Gels*, 2024, 10, 523.
5. J. R. Dias, S. Baptista-Silva, C. M. T. de Oliveira, A. Sousa, A. L. Oliveira, P. J. Bártolo and P. L. Granja, *Eur. Polym. J.*, 2017, 97, 379–392.
